# Supplementary material for: Cobalt phosphide embedded in a graphene nanosheet network as a high-performance anode for Li-ion batteries
Source: Royal Society of Chemistry journal article supplement (doi:10.1039/c9dt01240k), 2019-01-01
Supplement: c9dt01240k1.pdf [file c9dt01240k1.pdf]

## Electronic Supplementary Information

### **Cobalt phosphide embedded in graphene nanosheet network as a high-performance anode for Li-ion batteries**

Yang Yang,<sup>a</sup> Yufeng jiang,<sup>a</sup> Wenbin Fu,<sup>\*b</sup> Xiao-Zhen Liao,<sup>a</sup> Yu-Shi He,<sup>a</sup> Wan Tang,<sup>a</sup> Faisal M. Alamgir<sup>c</sup> and Zi-Feng Ma<sup>\*a</sup>

<sup>a</sup> *Shanghai Electrochemical Energy Devices Center, School of Chemistry and Chemical Engineering, Shanghai Jiao Tong University, Shanghai, 200240, China*

<sup>b</sup> *School of Physical Science and Technology, Lanzhou University, Lanzhou 730000, China*

<sup>c</sup> *School of Materials Science and Engineering, Georgia Institute of Technology, Atlanta, Georgia, 30332, United States*

\*Corresponding author.

*E-mail addresses:* [zfma@sjtu.edu.cn](mailto:zfma@sjtu.edu.cn) (Zi-Feng Ma), [fuwb15@lzu.edu.cn](mailto:fuwb15@lzu.edu.cn) (Wenbin Fu)

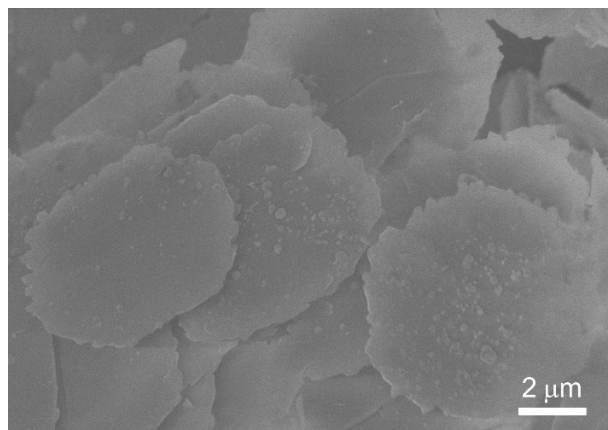

**Figure S1.** SEM image of CoP microplates.

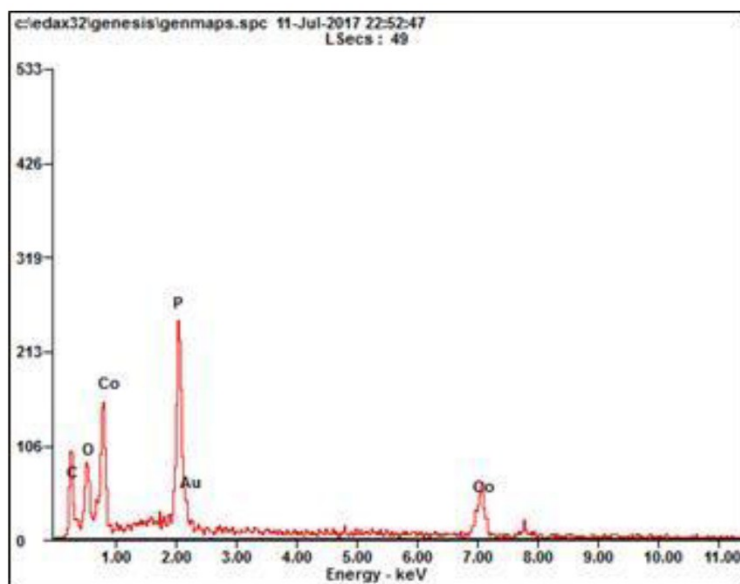

**Figure S2.** EDS spectrum of CoP/rGO nanocomposite.

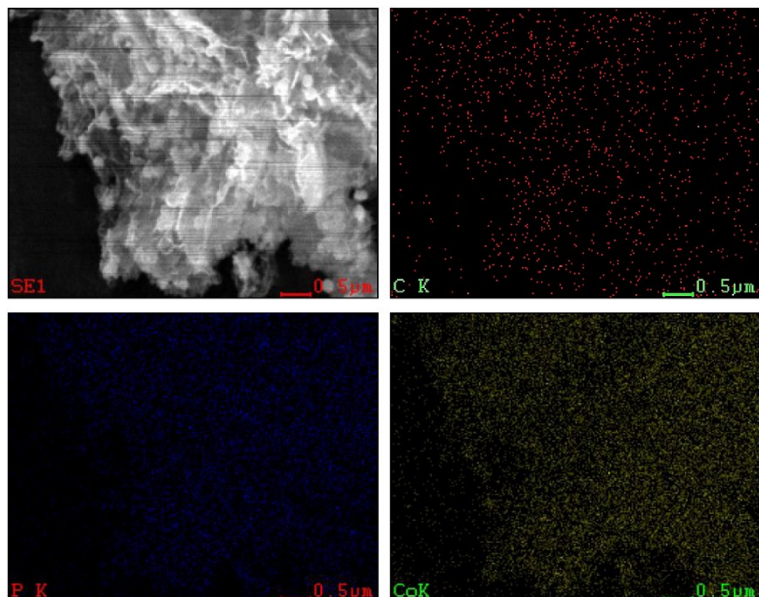

**Figure S3.** EDS maps of C, P and Co elements for the CoP/rGO nanocomposite.

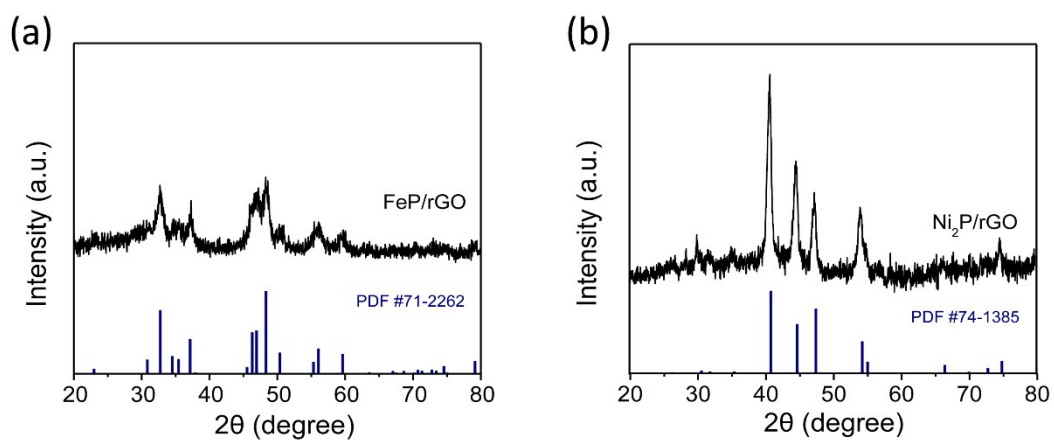

**Figure S4.** XRD patterns for (a) FeP/rGO and (b) Ni<sub>2</sub>P/rGO nanocomposites.

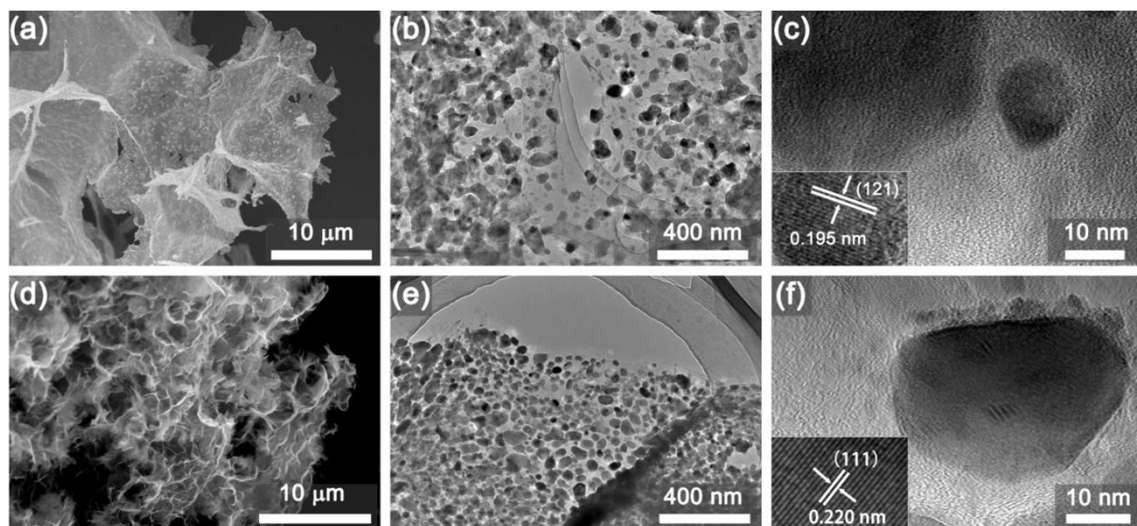

**Figure S5.** SEM images of (a) FeP/rGO and (d) Ni<sub>2</sub>P/rGO nanocomposites. TEM images of (b, c) FeP/rGO and (e, f) Ni<sub>2</sub>P/rGO

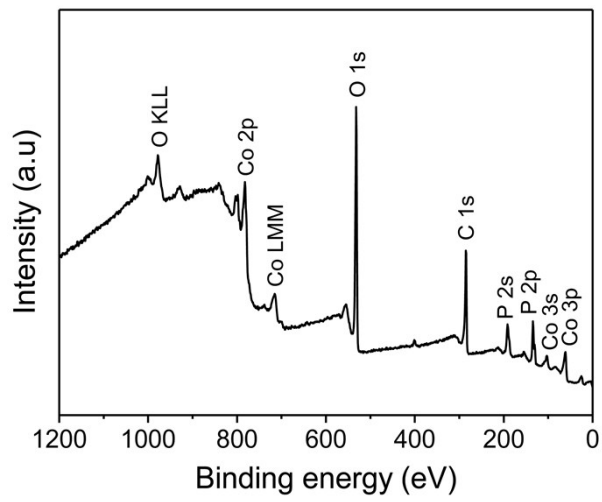

**Figure S6.** (a) XPS survey spectrum of the CoP/rGO nanocomposite.

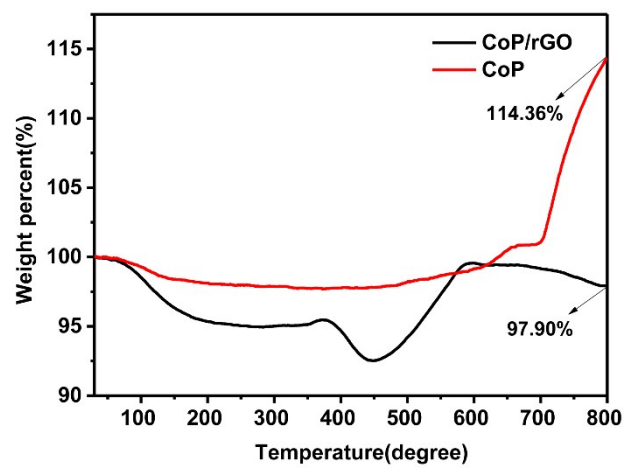

**Figure S7.** TGA plots for the CoP/rGO and pure CoP measured in air.

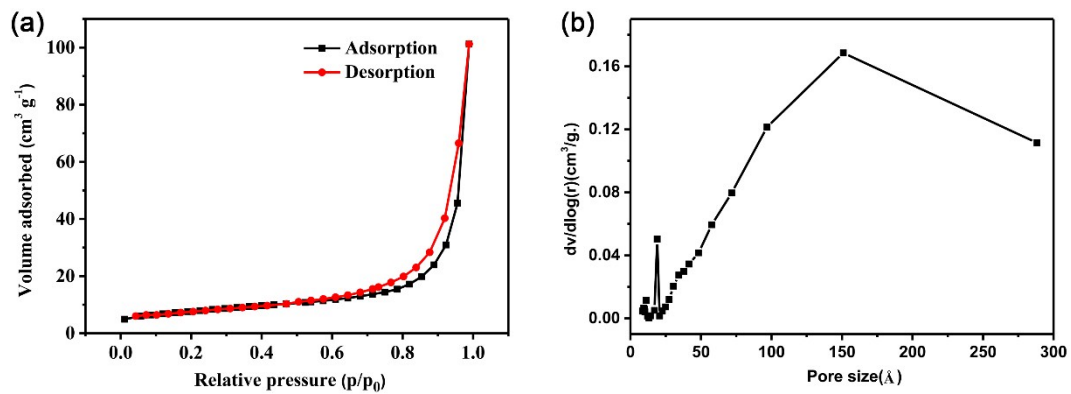

**Figure S8.** (a) N<sub>2</sub> absorption/desorption curve and (b) pore size distribution for the CoP/rGO nanocomposite.

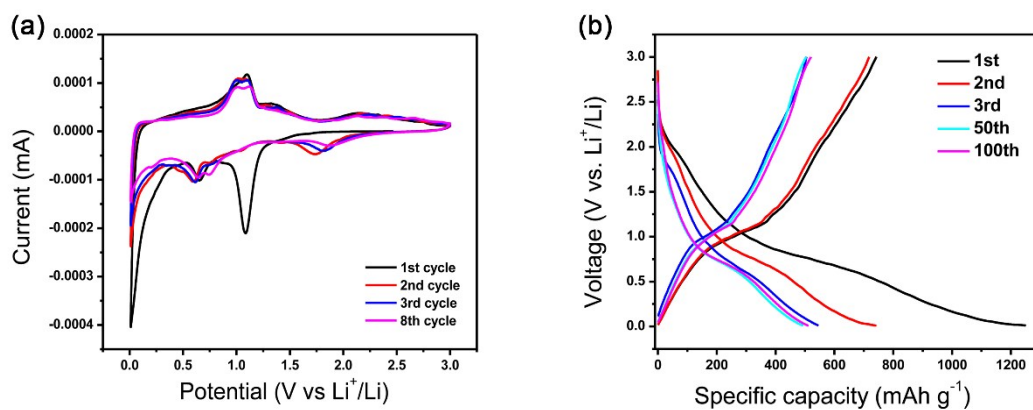

**Figure S9.** (a) CV curves at 0.1 mV s<sup>-1</sup> and (b) voltage profiles of pristine CoP.

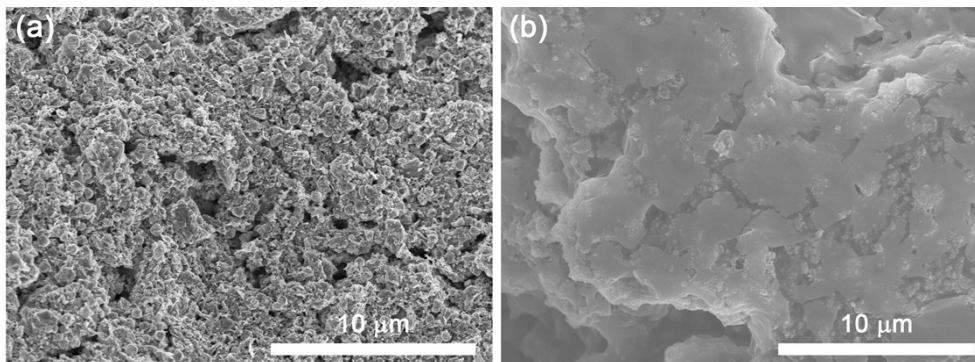

**Figure S10.** SEM images of the CoP/rGO electrode (a) before and (b) after 500 cycles.
